# Supplementary material for: Low temperature synthesis of monodisperse nanoscaled ZrO2with a large specific surface area
Source: Royal Society of Chemistry journal article supplement (doi:10.1039/c2dt12496c), 2012-10-12
Supplement: c2dt12496c.pdf [file c2dt12496c.pdf]

## Low temperature synthesis of monodisperse nanoscaled ZrO<sub>2</sub> with large specific surface area

Nicole Zink,<sup>a</sup> Franziska Emmerling,<sup>b</sup> Tobias Häger,<sup>c</sup> Martin Panthöfer,<sup>a</sup> Muhammad Nawaz Tahir,<sup>a</sup> Ute Kolb<sup>d</sup> and Wolfgang Tremel<sup>\*a</sup>

Supplementary material

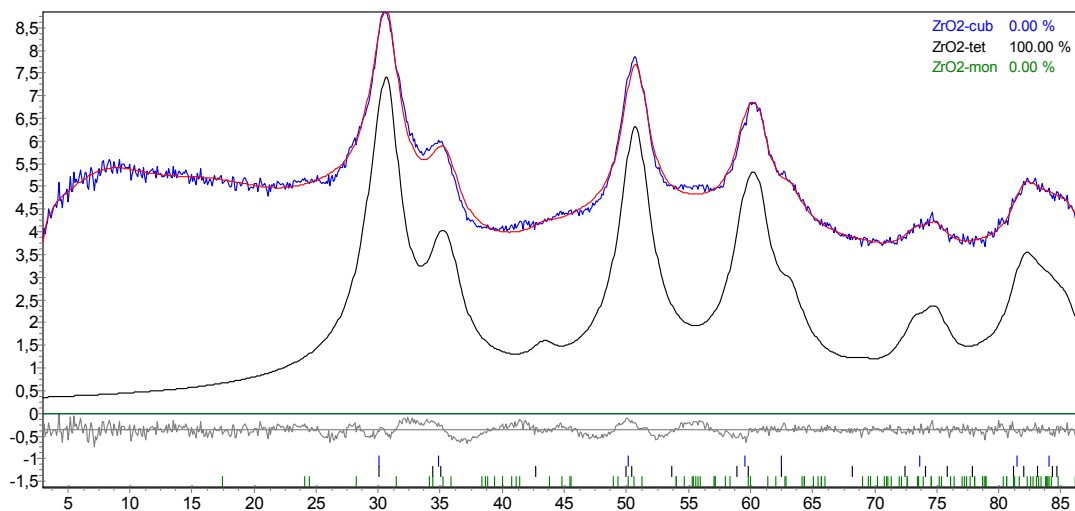

**Fig. S1.** Rietveld refinement of ZrO<sub>2</sub> synthesized at 300°C in an autoclave.

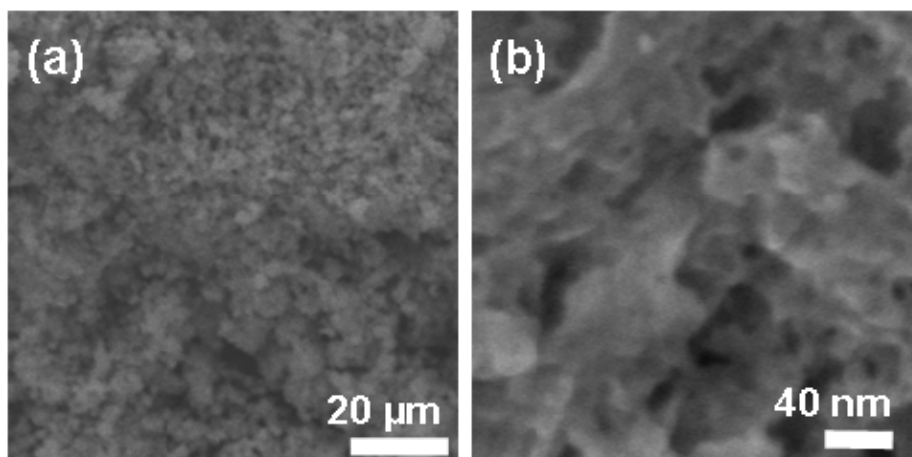

**Fig. S2.** SEM image of a 380AC (a) and HRSEM image of a 380TF ZrO<sub>2</sub> sample.

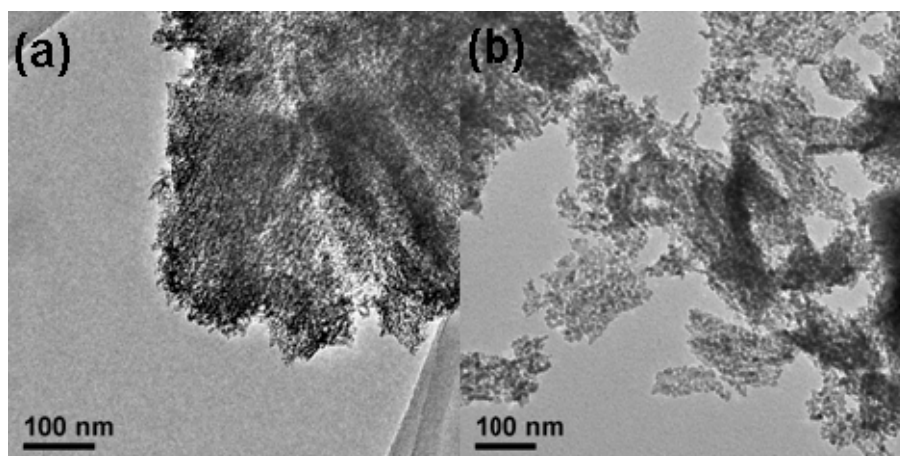

**Fig. S3.** TEM images of a 300AC (a) and a 380AC (b) ZrO<sub>2</sub> sample

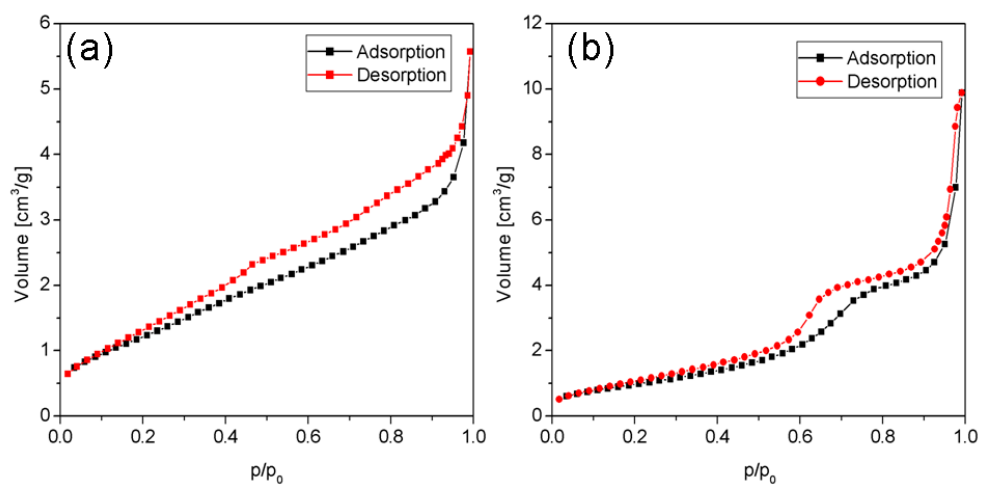

**Fig. S4.** N<sub>2</sub> adsorption (red) and desorption (black) isotherms for a 300AC (a) and a 380AC (b) ZrO<sub>2</sub> sample.
